# Supplementary material for: Annexin A5 regulates surface αvβ5 integrin for retinal clearance phagocytosis
Source: Oxford University Press journal article supplement (doi:10.1242/jcs.232439), 2019-09-12
Supplement: jcs232439supp.pdf [file jcs232439supp.pdf]

```
human ANXA5 (NP_001145.1) FATSLYSMIKGDTSGDY
mouse ANXA5 (NP_033803.1) FATSLYSMIKGDTSGDY
human ANXA6 (AAH17046.1) YEKSLYSMIKNDTSGEY
mouse ANXA6 isoform a (NP_038500.2) YEKSLYSMIKNDTSGEY
mouse ANXA6 isoform b (NP_001103681.1) YEKSLYSMIKNDTSGEY
```

**Figure S1. The integrin  $\beta 5$  binding motif in ANXA5 and ANXA6 is conserved between human and mouse. Gray boxes show the published integrin  $\beta 5$  binding motif of ANXA5.**

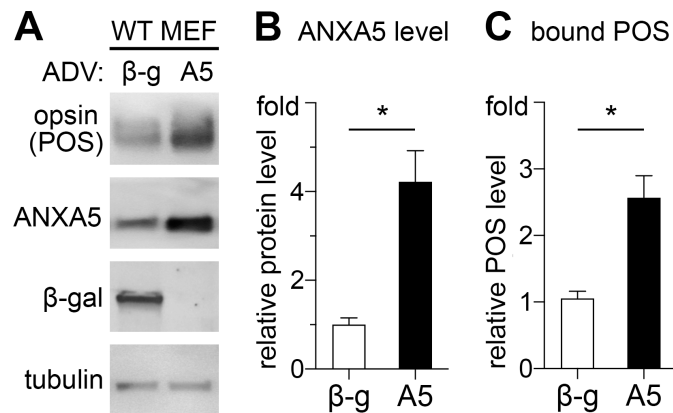

**Figure S2. ANXA5 overexpression increases POS binding by WT MEFs.** WT MEFs were infected with recombinant adenoviruses encoding  $\beta$ -gal ( $\beta$ -g) or ANXA5 (A5) before challenge with POS at 20°C for 1 h. Whole cell lysate representing equal numbers of cells were analyzed by immunoblotting with antibodies as indicated. **A.** A representative immunoblot shows bound POS-opsin and cellular proteins as indicated. A single blot membrane is shown probed sequentially to detect relevant proteins. **B.** Quantification of ANXA5 of WT MEFs using densitometry of immunoblots as shown in A. ANXA5 levels are normalized to ANXA5 of WT MEFs expressing  $\beta$ -gal, which is set as 1. **C.** Quantification of bound POS of WT MEFs using densitometry of immunoblots as shown in A. Bound POS are normalized to bound POS of WT MEFs expressing  $\beta$ -gal, which is set as 1. Data in B and C are expressed as mean  $\pm$  s.d.; n = 6 independent experiments with duplicate samples each.

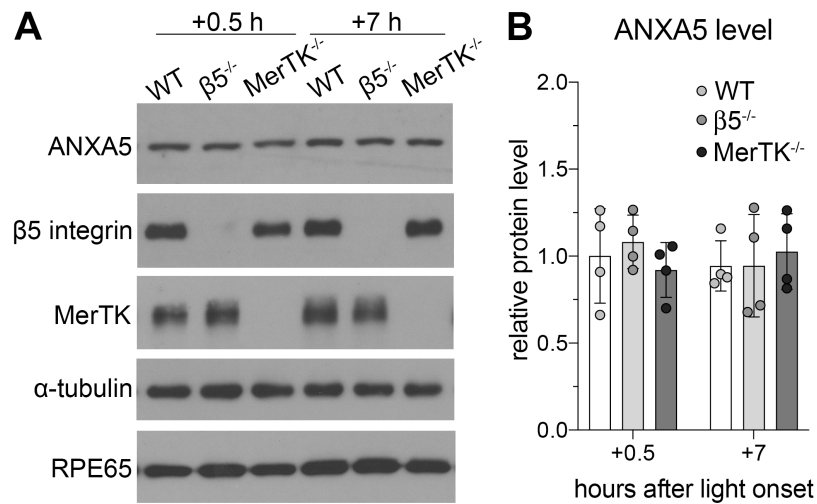

**Figure S3. ANXA5 protein levels are the same in RPE/choroid tissues of WT,  $\beta 5^{-/-}$  and MerTK $^{-/-}$  mice.** **A.** Representative immunoblots showing ANXA5 and marker proteins as indicated in RPE/choroid tissues from WT,  $\beta 5^{-/-}$  and MerTK $^{-/-}$  mice. Mice were sacrificed at 0.5 h or 7 h after light onset as indicated. **B.** Comparison of ANXA5 protein levels relative to the RPE specific marker RPE65. ANXA5 content of WT mice at 0.5 h after light onset was set as 1. Data are expressed as mean  $\pm$  s.d.; eyes from 4 mice per time point per group.

**Table S1. Primary antibodies used in this study.** Abbreviations:

IB: immunoblotting; IF: immunofluorescence.

|                                            | <b>Company</b>  | <b>Catalog #</b> | <b>Dilution</b>       |
|--------------------------------------------|-----------------|------------------|-----------------------|
| rhodopsin (clone B630)                     | N/A             | N/A              | IB: 1:1000; IF: 1:100 |
| annexin A5                                 | Hyphen Biomed   | PA120A           | IB: 1:500; IF: 1:100  |
| $\beta$ -galactosidase                     | Abcam           | ab4761           | IB: 1:2000            |
| annexin A2                                 | BD Transduction | 610068           | IB: 1:10000           |
| $\alpha$ v integrin                        | BD Transduction | 611013           | IB: 1:500             |
| $\beta$ -catenin                           | BD Transduction | 610154           | IF: 1:200             |
| $\beta$ -actin                             | Millipore-Sigma | M4758            | IB: 1:2000            |
| annexin A6                                 | Santa Cruz      | sc-1931          | IB: 1:500             |
| $\beta$ 5 integrin (H-96)                  | Santa Cruz      | sc-14010         | IB: 1:400             |
| GFP                                        | Santa Cruz      | sc-9996          | IB: 1:2000; IF: 1:100 |
| $\alpha$ v $\beta$ 5 integrin (clone P1F6) | BioLegend       | MMS-474R         | live IF: 1:50         |
| RPE65                                      | Genetex         | GTX103472        | IB: 1:3000            |
| $\alpha$ -tubulin                          | Abcam           | ab7291           | IB: 1:3000            |
| zap70                                      | Cell Signaling  | 99F2             | IB: 1:500             |

**Table S2. Primers used to generate ANXA5 mutants.**

| ID      | Sequence                                                                               |
|---------|----------------------------------------------------------------------------------------|
| A5-FL   | forward: GCAGCGATCGCCATGGCTACGAGAGGCAC<br>reverse: ATTACGCGTGTCATCCTCGCCCCCGCA         |
| A5-nd20 | forward: ATT GCGATCGCATG CTTCGGAAGGCCATGAAAG<br>reverse: ATT ACGCGT GTCATCCTCGCCCCCGCA |
| A5-cd67 | forward: GCAGCGATCGCCATGGCTACGAGAGGCAC<br>reverse: GCAACGCGTGGTCTCTGCAAGGTAGGC         |
| A5-cd20 | forward: GCAGCGATCGCCATGGCTACGAGAGGCAC<br>reverse: GCAACGCGTCTTGATCATAGAGTACAGGGAGGTGG |
